# Supplementary material for: Lentiviral vectors escape innate sensing but trigger p53 in human hematopoietic stem and progenitor cells
Source: PubMed Central journal article supplement (PMC5582409; doi:10.15252/emmm.201707922), 2017-06-30
Supplement: EMMM-9-1198-s001.pdf [file EMMM-9-1198-s001.pdf]

**Appendix Table of Contents:**

**Appendix Table S1**

**Appendix Table S2**

**Appendix Table S3**

**Appendix Table S4**

**Appendix Table S5**

**Supplementary Methods**

**Supplementary References**

**Appendix Table S1.** Number of genes changing and differentially expressed over time under  $p$ -value  $\leq 0.05$ .

| Condition                               | Genes changing over time                          |
|-----------------------------------------|---------------------------------------------------|
| Untreated                               | 5883                                              |
| Poly(I:C)                               | 9496                                              |
| Bald LV                                 | 7307                                              |
| Lab LV                                  | 7080                                              |
| Purified LV                             | 7248                                              |
| Inactivated purified LV                 | 7512                                              |
| Condition                               | Genes differentially expressed between conditions |
| Untreated Vs. Poly (I:C)                | 2691                                              |
| Untreated Vs. Lab LV                    | 645                                               |
| Untreated Vs. Purified LV               | 397                                               |
| Bald LV Vs. Lab LV                      | 321                                               |
| Inactivated Purified LV vs. Purified LV | 281                                               |

**Appendix Table S2.** Significance, in the context of the comparison between Lab LV and Bald LV, of the top 40 genes activated by poly(I:C) in HSPC.

| Gene     | $p$ value |
|----------|-----------|
| IFI6     | 0.662955  |
| TVP23A   | 0.407102  |
| ISG15    | 0.964351  |
| IFI44L   | 0.525873  |
| IFI44    | 0.812837  |
| IFI35    | 0.955392  |
| ISG20    | 0.020014  |
| DDX60    | 0.840026  |
| HERC6    | 0.973159  |
| LGALS3BP | 0.753786  |

|          |          |
|----------|----------|
| HLA-F    | 0.935258 |
| MX1      | 0.904987 |
| PARP12   | 0.924286 |
| EPSTI1   | 0.971483 |
| SAT1     | 0.216319 |
| OAS3     | 0.980706 |
| IFITM1   | 0.861568 |
| HCP5     | 0.831475 |
| IRF7     | 0.80476  |
| XAF1     | 0.796685 |
| DHX58    | 0.764003 |
| H19      | 0.217731 |
| ODF3B    | 0.569558 |
| IFI27    | 0.456448 |
| TRIM22   | 0.00061  |
| CSAG3    | 0.369604 |
| USP18    | 0.95428  |
| KLHDC7B  | 0.960367 |
| MX2      | 0.948736 |
| OAS1     | 0.983136 |
| HLA-DQA1 | 0.566047 |
| CCL5     | 0.503809 |
| GDF11    | 0.74255  |
| ARG2     | 0.864504 |
| OPTN     | 0.953236 |
| OAS2     | 0.971224 |
| GP1BA    | 0.714797 |
| USP41    | 0.784604 |
| LAMC2    | 0.256181 |
| STAT1    | 0.586429 |
| PLSCR1   | 0.496799 |

|          |          |
|----------|----------|
| IFITM3   | 0.441251 |
| HELZ2    | 0.695985 |
| ACO1     | 0.579893 |
| DDX58    | 0.86283  |
| C19orf66 | 0.724447 |
| PARP9    | 0.950643 |
| OASL     | 0.832593 |
| CXCL11   | 0.182701 |

**Appendix Table S3.** Cell counts of in vivo experiments.

|                   | N Cell Counted at TD | N Cell Counted at TP | N Cell Infused | Source |     |
|-------------------|----------------------|----------------------|----------------|--------|-----|
| Empty LV          | 890000               | 816666               | 80000          | CB     |     |
| LV                | 1240000              | 1390000              | 80000          |        |     |
| Empty LV          | 840000               | 690000               | 80000          |        |     |
| LV                | 1160000              | 900000               | 80000          |        |     |
| Bald DMSO         | 700000               | 904000               | 80000          |        |     |
| LV DMSO           | 700000               | 840000               | 80000          |        |     |
| Bald KU           | 800000               | 957000               | 80000          |        |     |
| LV KU             | 800000               | 1030000              | 80000          |        |     |
| Bald DMSO         | 625000               | 1000000              | 80000          |        |     |
| LV DMSO           | 625000               | 600000               | 80000          |        |     |
| Bald KU           | 625000               | 800000               | 80000          |        |     |
| LV KU             | 625000               | 600000               | 80000          |        |     |
| Inact LV          | 1750000              | 3710000              | 514285         |        | mPB |
| Clinical-grade LV | 1750000              | 3050000              | 422857         |        |     |
| Bald              | 800000               | 1744000              |                | CB     |     |
| LV                | 800000               | 1216000              |                |        |     |
| Bald DMSO         | 2000000              | 2200000              | 500000         | CB     |     |
| LV DMSO           | 2000000              | 2075000              | 500000         |        |     |

**Appendix Table S4.** List of anti-human antibodies used in this study.

| <b>Antibody for FACS</b> | <b>Fluorochrome</b> | <b>Dilution</b> | <b>Clone</b> | <b>Company</b>  | <b>Code</b> |
|--------------------------|---------------------|-----------------|--------------|-----------------|-------------|
| hCD235a                  | APC                 | 1:25            | GA-R2        | BD Biosciences  | 551336      |
| hCD33                    | BV421               | 1:25            | WM53         | BD Biosciences  | 562854      |
| Anti human FCR Blocking  |                     | 1:50            |              | Miltenyi Biotec | 120-000-442 |
| Anti murine FCR Blocking |                     | 1:100           | 2.4G2        | BD Pharmingen   | 553142      |
| hCD45                    | APC-Cy7             | 1:33            | HI30         | eBiosciences    | 47-0459-42  |
| hCD19                    | PE                  | 1:25            | SJ25C1       | BD Biosciences  | 345789      |
| hCD33                    | PeCy7               | 1:25            | P67.6        | BD Biosciences  | 333952      |
| hCD3                     | APC                 | 1:25            | UCHT1        | BD Biosciences  | 555335      |
| hCD13                    | BV                  | 1:25            | WM15         | BD Biosciences  | 562596      |
| hCD34                    | PeCy7               | 1:25            | 8G12         | BD Biosciences  | 348811      |
| hCD38                    | V450                | 1:25            | HB7          | BD Biosciences  | 646851      |
| hCD90                    | APC                 | 1:25            | 5E10         | BD Biosciences  | 559869      |
| hCD45RA                  | VioBlue             | 1:10            | T6D11        | Miltenyi Biotec | 130-095-464 |
| hCD133                   | PE                  | 1:15            | 293C3        | Miltenyi Biotec | 130-090-853 |
| hCD38                    | APC                 | 1:10            | IB6          | Miltenyi Biotec | 130-092-261 |
| Ki-67                    | PE                  |                 | B56          | BD Biosciences  | 556027      |

|                        |                    |                 |              |                           |             |
|------------------------|--------------------|-----------------|--------------|---------------------------|-------------|
| hCD90                  | Brillant Violet    | 1:30            |              | Biolegend                 | 328122      |
| Annexin V              | Pacific Blue       | 1:20            |              | Biolegend                 | 640918      |
| Hoechst                |                    |                 |              | Thermo Fisher             | H3570       |
| 7-AAD                  |                    |                 |              | Sigma-Aldrich             | A9400       |
| <b>Antibody for WB</b> | <b>Produced in</b> | <b>Dilution</b> | <b>Clone</b> | <b>Company</b>            | <b>Code</b> |
| p53Ser15               | Rabbit             | 1:1000          | Polyclonal   | Cell signaling Technology | 284S        |
| p53                    | Mouse              | 1:200           | DO-1         | Santa Cruz                | Sc126       |
| p21                    | Rabbit             | 1:1000          | 12D1         | Cell signaling Technology | 2947        |
| $\gamma$ -H2AX         | Rabbit             | 1:1000          | 20E3         | Cell signaling Technology | 9718        |
| pSer1981ATM            | Rabbit             | 1:1000          | D25E5        | Cell signaling Technology | 13050       |
| ATM                    | Rabbit             | 1:1000          | D2E2         | Cell signaling Technology | 2873        |

**Appendix Table S5.** List of primers used in this study.

| <b>Primers for GE</b> | <b>Method</b> | <b>Company</b> | <b>Code</b>   |
|-----------------------|---------------|----------------|---------------|
| hCDKN1A (p21)         | RT-PCR        | Thermo Fisher  | Hs00355782_m1 |
| hHPRT1                | RT-PCR        | Thermo Fisher  | Hs01003267_m1 |
| hIRF7                 | RT-PCR        | Thermo Fisher  | Hs01014809_g1 |
| hPHLDA3               | RT-PCR        | Thermo Fisher  | Hs00385313_m1 |
| hISG15                | RT-PCR        | Thermo Fisher  | Hs01921425_s1 |

|                       |                           |               |                        |
|-----------------------|---------------------------|---------------|------------------------|
| hOAS1                 | RT-PCR                    | Thermo Fisher | Hs00973637_m1          |
| hDDB2 (p48)           | RT-PCR                    | Thermo Fisher | Hs03044953_m1          |
| hBBC3 (PUMA)          | RT-PCR                    | Thermo Fisher | Hs00248075_m1          |
| mIrf7                 | RT-PCR                    | Thermo Fisher | Mm00516788_m1          |
| mOas1                 | RT-PCR                    | Thermo Fisher | Mm00836412_m1          |
| mIrf1                 | RT-PCR                    | Thermo Fisher | Mm00515153_m1          |
| mIsg15                | RT-PCR                    | Thermo Fisher | Mm01705338_s1          |
| mHprt                 | RT-PCR                    | Thermo Fisher | Mm01545399_m1          |
| mCdkn1a               | RT-PCR                    | Thermo Fisher | Mm04207341_m1          |
| <b>Primer for VCN</b> | <b>Sequence (5' → 3')</b> | <b>Method</b> | <b>Reference</b>       |
| LV-Sense              | TACTGACGCTCTCGCACC        | RT-PCR/ddPCR  | (Matrai et al, 2011)   |
| LV-Antisense          | TCTCGACGCAGGACTCG         |               |                        |
| LV-Probe              | ATCTCTCTCCTTCCTTCTAGCCTC  |               |                        |
| RT-LV (ΔU3 sense)     | TCACTCCCAACGAAGACAAGATC   |               |                        |
| RT-LV (Gag antisense) | GAGTCCTGCGTCGAGAGAG       |               |                        |
| RT-RV (ΔU3 sense)     | CGAGCTCAATAAAAAGAGCCCAC   | ddPCR         |                        |
| RT-RV (PBS antisense) | ACAGATAGGTTGCTGGCCAG      | ddPCR         |                        |
| hTert fw              | GGCACACGTGGCTTTTTCG       | RT-PCR/ddPCR  | (Lombardo et al, 2007) |
| hTert rev             | GGTGAACCTCGTAAGTTTATGC    |               |                        |

|                      |                               |       |                           |
|----------------------|-------------------------------|-------|---------------------------|
|                      | AA                            |       |                           |
| hTert Probe          | TCAGGACGTCGAGTGGACACG<br>GTG  |       |                           |
| 2LTR Fw<br>(2Junct)  | CAGTGTGGAAAATCTCTAGCAG<br>TAC | ddPCR | (Petrillo et al,<br>2015) |
| 2LTR Rev (J2<br>Rev) | GCCGTGCGCGCTTCAGCAAGC         |       |                           |

## Supplementary Methods

### *Cells and transductions*

K562 and Hela cell lines were plated in complete Iscove's modified Dulbecco's medium (Euroclone). HL-60 cells were grown and transduced in complete RPMI. HCT-116 cells were grown and transduced in complete Dulbecco's Modified Eagle Medium (DMEM). Human CD34<sup>+</sup> hematopoietic stem and progenitor cells (HSPC) and CD4<sup>+</sup> T cells were isolated through magnetic bead selection according to manufacturer's instructions (Milteny) from umbilical cord blood (CB) collected upon informed consent from healthy volunteers according to the Institutional Ethical Committee approved protocol (TIGET01). Otherwise, CB and bone marrow (BM)-derived CD34<sup>+</sup> were directly purchased from Lonza. G-CSF mobilized peripheral blood (mPB)-CD34<sup>+</sup> cells were purchased from hemacare. Murine Lin<sup>-</sup> cells were isolated through magnetic bead selection according to the manufacturer's instructions (Miltenyi) from bone marrow of euthanized C57/BL6 mice.

Soon after purification or thawing, human CB CD34<sup>+</sup> cells were plated in culture at a concentration of 1×10<sup>6</sup> cells/ml in CellGro Serum-Free Medium (CellGenix) or StemSpan (STEMCELL TECHNOLOGIES) supplemented with penicillin (100 IU/ml), streptomycin (100 µg/ml) and 2% glutamine in the presence of human cytokines (Interleukin-6 (IL-6) (20 ng/ml), thrombopoietin (TPO) (20 ng/ml), Stem Cell Factor

LV triggers DNA damage responses in human hematopoietic stem cells

(SCF) (100 ng/ml), and Flt3 ligand (Flt3-L) (100 ng/ml) (PeproTech) for O/N prestimulation. BM and mPB-CD34<sup>+</sup> were plated in retronectine-coated plates in StemSpan or CellGro respectively supplemented with penicillin (100 IU/ml), streptomycin (100 µg/ml) and 2% glutamine in the presence of human cytokines Interleukin3 (IL-3) (100 ng/ml), thrombopoietin (TPO) (100 ng/ml), Stem Cell Factor (SCF) (300 ng/ml), and Flt3 ligand (Flt3-L) (300 ng/ml) (PeproTech) for O/N prestimulation. After 18-24 hours of stimulation CD34<sup>+</sup> cells were transduced at the indicated MOI. For the clinical standard double-hit transduction protocol, cells were washed 16 hours after the first vector exposure, left to recover in cytokine-supplemented medium for 10 hours and re-exposed to the second hit of vector for another 16 hours before transplantation. Transduction with the AAV6 vectors were performed at an MOI of 10000 as calculated by titration of the vector preparation expressed in vector genome per mL (vg/mL). All the transductions were performed at  $1 \times 10^6$  cells/ml concentration. In the experiment with antiretroviral inhibitors, the drugs were added together with the vector. Raltegravir and 3TC were used at 10 µM, and AZT at 25 µM. In the ATM inhibition experiment single hit of the ATM inhibitor KU55933 (Selleck Chemicals) was added on the cells 2 hours before the transduction at 10 µM concentration. All cells were maintained in a 5% CO<sub>2</sub> humidified atmosphere at 37°C.

#### *RNA-Seq data generation and analysis*

Total RNA was extracted with the RNeasy Plus Micro kit (Qiagen) according manufacturer's indications. RNA integrity was analyzed with the Agilent 2100 Bioanalyzer (Agilent Technologies, Santa Clara, CA). Libraries, prepared starting from 100ng of total RNA/sample with the Illumina TruSeq RNA Sample Prep kit v2 procedure, were quantified by the Qubit BR assay (Life Technologies, Illkirch,

France) and the Agilent 2100 Bioanalyzer. Sequencing was performed on the Illumina HiSeq 2000 platform using SBS 2x100PE protocol. In average for each sample we obtained 30M reads .Each gene was then characterized by the total number of reads overlapping it. Normalization and differential gene expression was evaluated using linear models implemented in R/Bioconductor limma package(Smyth, 2004). Pathway analysis was initially performed using EnrichrR platform (Chen et al, 2013), most of the advanced network modeling was performed using Cytoscape (v3.2.0). The complete RNA-Seq dataset is available at NCBI, accession number GSE92652.

### *FACS*

All cytometric analyses were performed using the FACS Canto III and LSRFortessa instruments (BD Biosciences, San Jose, CA) and analyzed with the FACS Express software (De Novo Software, Glendale, CA). GFP expression in transduced cells was measured 5-7 days post-transduction. To exclude dead cells from the analysis, cells were washed and resuspended in PBS containing 10 ng/ml 7-aminoactinomycin D (7-AAD, Sigma-Aldrich). The apoptosis assays were performed with the Annexin V Apoptosis Detection Kit I (BD Pharmigen) according to the manufacturer's instructions and 48 hours after transduction, if not otherwise indicated. The cell proliferation assay was performed with the Cell Proliferation Dye eFluor 670 (eBioscience) according to the manufacturer's instructions. To calibrate the cytometer, rainbow beads (Spherotech) were used to set the dye signal in the different days of the analysis. The cell cycle analysis was performed by Ki67 (BD Pharmigen) and Hoechst (Invitrogen) staining as previously described (Lechman et al, 2012) 48 hours after the transduction. (for all antibodies see **Appendix Table S4**).

### *RNA, DNA and Proteins*

Total RNA was extracted with the RNeasy Plus Micro kit or RNeasy Micro Kit (Qiagen) and Reverse transcription was performed using SuperScriptVILO cDNA Synthesis Kit (ThermoFisher Scientific) according to manufacturers' instructions. Gene expression analysis was performed by Taqman probe (Thermo Fisher, **Appendix Table S5**) as previously described (Petrillo et al., 2015), human HPRT1 or murine Hprt were used to normalize the total quantity of human or mouse cDNA input respectively. See Table S6 for the complete list of Taqman Probe reagents.

### *Vector Copy Number (VCN)*

For VCN, total DNA was extracted using a Maxwell 16 instrument (Promega) or Blood & Cell Culture DNA micro kit (Qiagen). Copy Number of the integrated lentiviral vector were assessed as previously described (Lombardo et al., 2007; Petrillo et al., 2015; Santoni de Sio et al., 2008) or by digital droplet PCR (dd-PCR), (BIO-RAD, California, USA) according to the manufacturers' instructions using hTERT gene as normalizer. Copy Number of the total lentiviral DNA (integrated and non-integrated) were performed as previously described (Matrai et al., 2011) at three days post-transduction. Copy Number of the reverse transcribed retroviral vector genome (both integrated and non-integrated) was performed by dd-PCR discriminating it from plasmid carried over from the transient transfection using the following primers: RT-RV;  $\Delta$ U3 sense: 5'-CGAGCTCAATAAAAGAGCCCAC-3', PBS antisense: 5'-GAGTCCTGCGTCGGAGAGAG-3'. The amount of human DNA loaded in the reaction was quantified with a qPCR or ddPCR designed to amplify the hTERT gene as described (Lombardo et al., 2007). The 2LTR circles copy number was performed in dd-PCR with previously described primers (Petrillo et al., 2015). See

**Appendix Table S5** for the complete list of primers. Unless otherwise specified, copy numbers are expressed as amplicon copies per cell (diploid genome).

### *Western Blot*

Western Blot was performed as previously described (Kajaste-Rudnitski et al., 2006; Petrillo et al., 2015). Samples were subjected to SDS-PAGE on Bolt 4-12% Bis-Tris Plus gels (ThermoFisher, CAT # NW04120BOX) and transferred to PVDF membrane by electroblotting. See **Appendix Table S4** for the complete list of the antibodies.

### **Supplementary References**

Chen EY, Tan CM, Kou Y, Duan Q, Wang Z, Meirelles GV, Clark NR, Ma'ayan A (2013) Enrichr: interactive and collaborative HTML5 gene list enrichment analysis tool. *BMC Bioinformatics* **14**: 128

Lechman ER, Gentner B, van Galen P, Giustacchini A, Saini M, Boccalatte FE, Hiramatsu H, Restuccia U, Bachi A, Voisin V, Bader GD, Dick JE, Naldini L (2012) Attenuation of miR-126 activity expands HSC in vivo without exhaustion. *Cell Stem Cell* **11**: 799-811

Lombardo A, Genovese P, Beausejour CM, Colleoni S, Lee YL, Kim KA, Ando D, Urnov FD, Galli C, Gregory PD, Holmes MC, Naldini L (2007) Gene editing in human stem cells using zinc finger nucleases and integrase-defective lentiviral vector delivery. *Nat Biotechnol* **25**: 1298-1306

Matrai J, Cantore A, Bartholomae CC, Annoni A, Wang W, Acosta-Sanchez A, Samara-Kuko E, De Waele L, Ma L, Genovese P, Damo M, Arens A, Goudy K, Nichols TC, von Kalle C, MK LC, Roncarolo MG, Schmidt M, Vandendriessche T, Naldini L (2011) Hepatocyte-targeted expression by integrase-defective lentiviral vectors induces antigen-specific tolerance in mice with low genotoxic risk. *Hepatology* **53**: 1696-1707

Petrillo C, Cesana D, Piras F, Bartolaccini S, Naldini L, Montini E, Kajaste-Rudnitski A (2015) Cyclosporin a and rapamycin relieve distinct lentiviral restriction blocks in hematopoietic stem and progenitor cells. *Mol Ther* **23**: 352-362

Smyth GK (2004) Linear models and empirical bayes methods for assessing differential expression in microarray experiments. *Stat Appl Genet Mol Biol* **3**: Article3
