# Supplementary material for: Lentiviral vectors escape innate sensing but trigger p53 in human hematopoietic stem and progenitor cells
Source: PubMed Central journal article supplement (PMC5582409; doi:10.15252/emmm.201707922), 2017-06-30

Source Data, WB, Fig 1J and Fig 4D

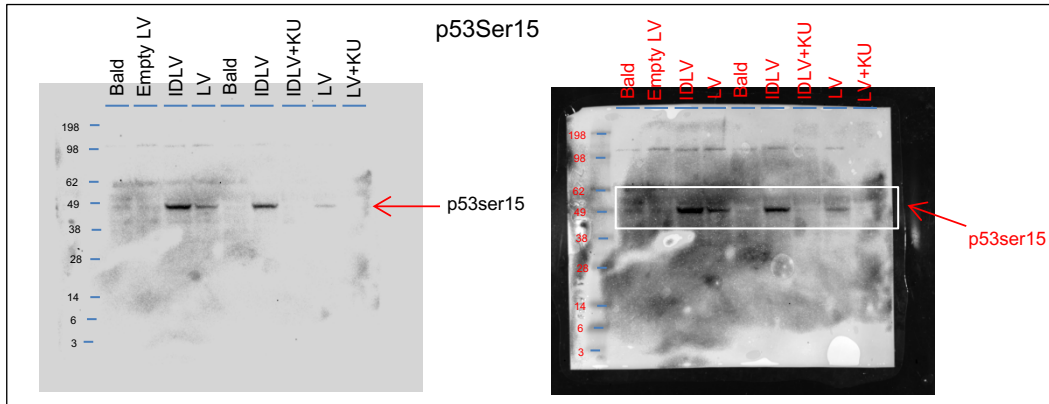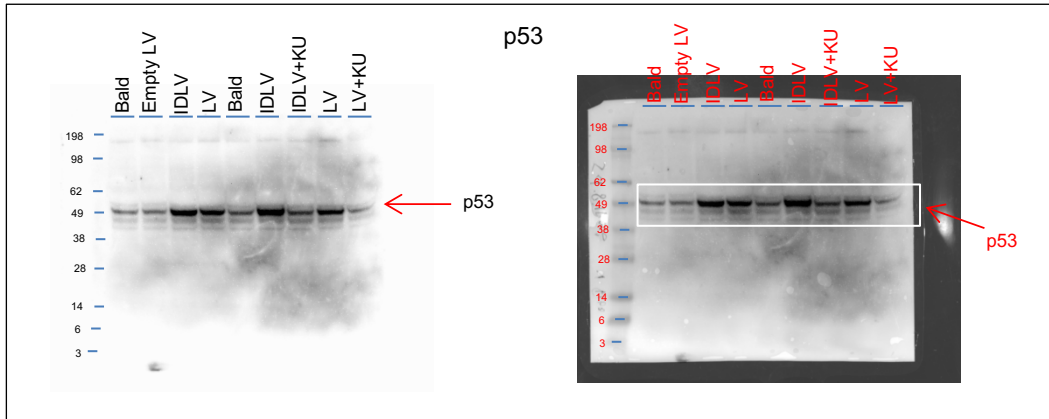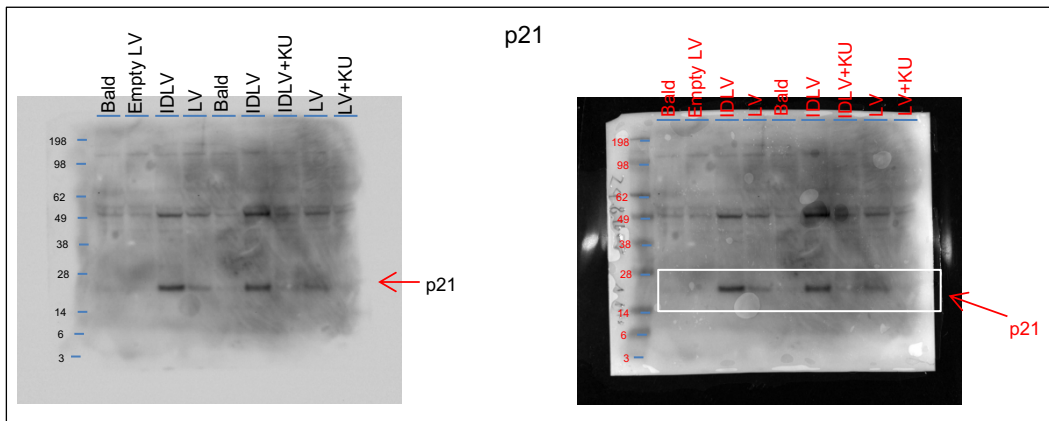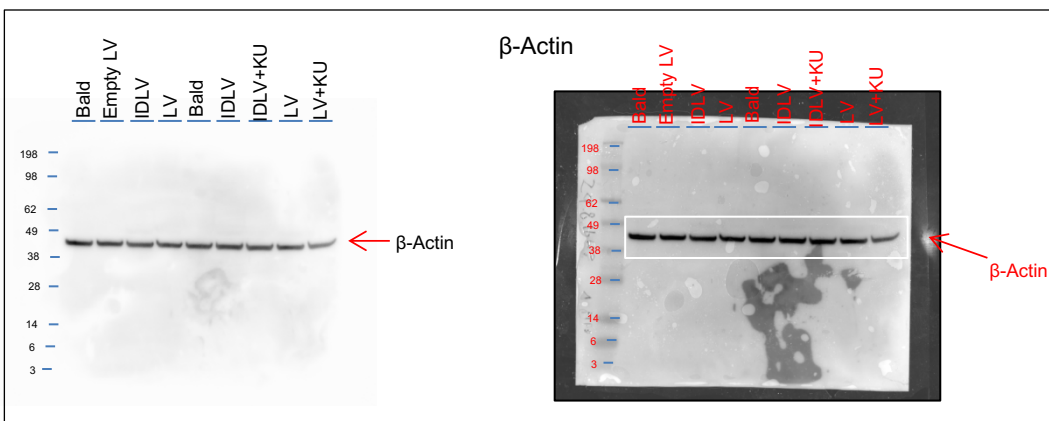

Supplement: EMMM-9-1198-s004.pdf [file EMMM-9-1198-s004.pdf]
